# Supplementary material for: Structure and dynamics of an active polymer chain inside a nanochannel grafted with polymers
Source: Royal Society of Chemistry journal article supplement (doi:10.1039/d3sm00618b), 2023-01-01
Supplement: d3sm00618b11.pdf [file d3sm00618b11.pdf]

## Electronic Supplementary Information: Structure and dynamics of an active polymer chain inside a nanochannel grafted with polymers

Rajiblochan Sahoo<sup>a</sup>, and Rajarshi Chakrabarti<sup>a,\*</sup>

<sup>a</sup>*Department of Chemistry,*

*Indian Institute of Technology Bombay, Mumbai 400076, India*

*E-mail: rajarshi@chem.iitb.ac.in*

### I. STRUCTURAL PROPERTIES OF A POLYMER INSIDE A NANOCHANNEL WITHOUT GRAFTED POLYMERS

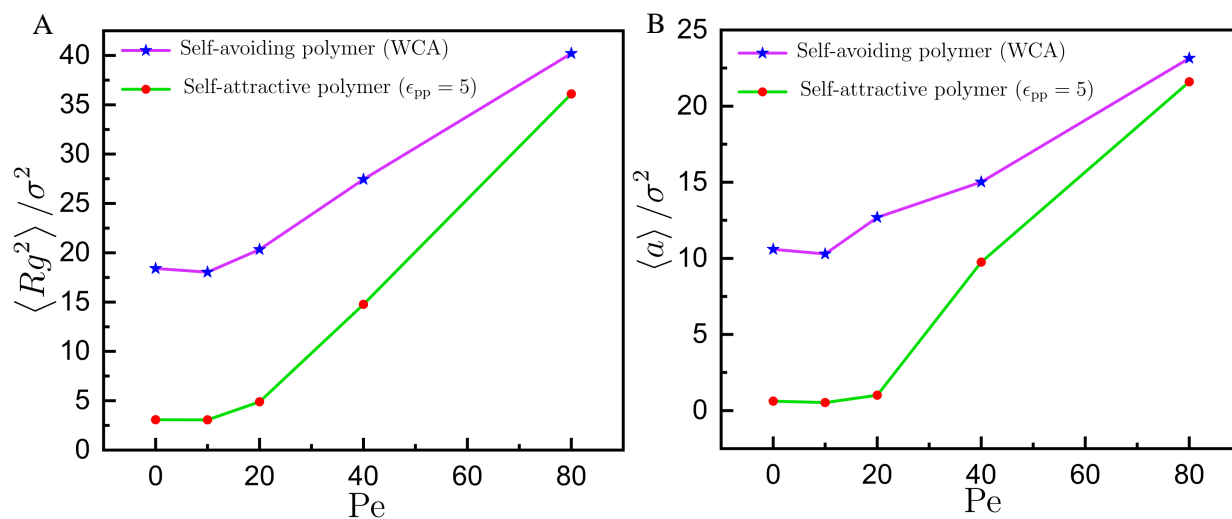

Fig. S1. (A) Plots of  $\langle R_g^2 \rangle$  of self-avoiding and self-attractive probe-polymer at different Pe and (B) asphericity ( $\langle a \rangle$ ) of self-avoiding and self-attractive probe-polymer at different Pe inside a nanochannel.

## II. STRUCTURAL PROPERTIES OF PROBE-POLYMER INSIDE NANOCHANNEL GRAFTED WITH POLYMERS

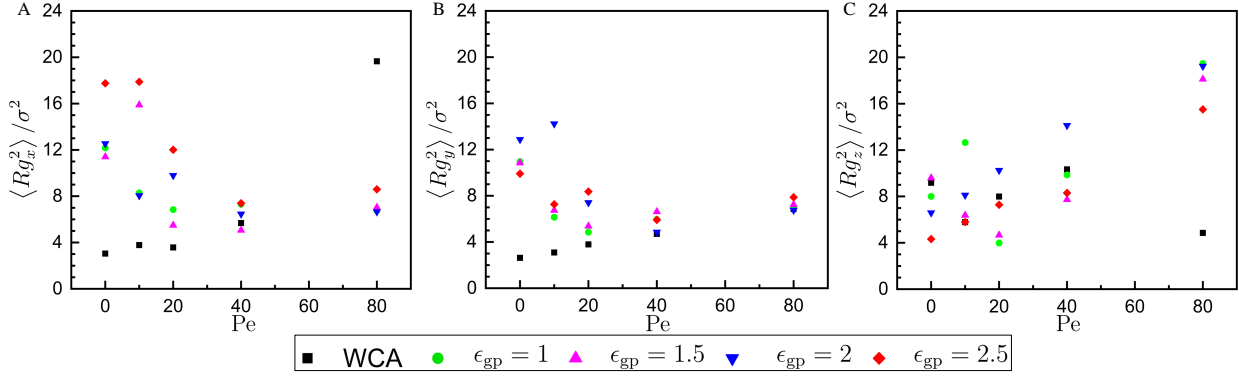

Fig. S2. (A) Plots of  $\langle R_{gx}^2 \rangle$  vs.  $Pe$  as a function of  $\epsilon_{gp}$ , (B) Plots of  $\langle R_{gy}^2 \rangle$  vs.  $Pe$  as a function of  $\epsilon_{gp}$ , and (C) Plots of  $\langle R_{gz}^2 \rangle$  vs.  $Pe$  as a function of  $\epsilon_{gp}$  for self-avoiding probe-polymer in the crowded nanochannel. Here,  $\langle R_{gx}^2 \rangle$ ,  $\langle R_{gy}^2 \rangle$ , and  $\langle R_{gz}^2 \rangle$  are the values along x-direction, y-direction, and z-direction respectively.

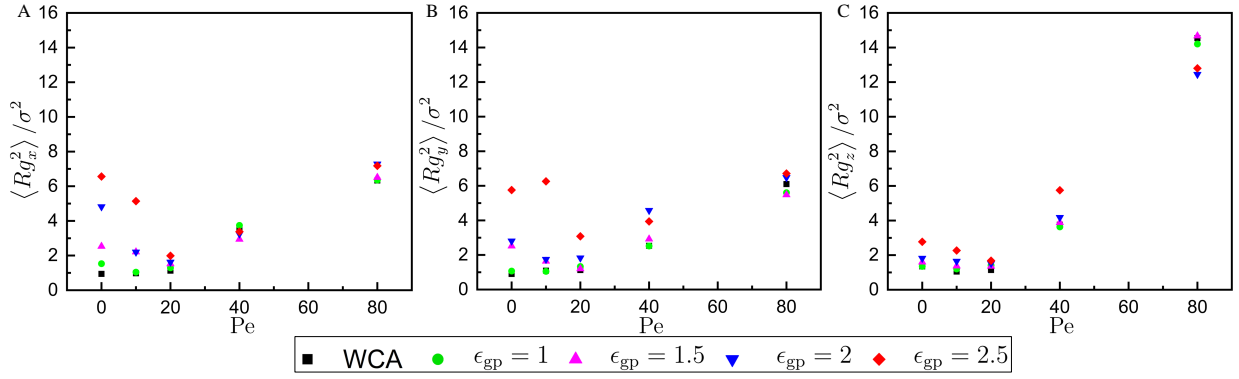

Fig. S3. (A) Plots of  $\langle R_{gx}^2 \rangle$  vs.  $Pe$  as a function of  $\epsilon_{gp}$ , (B) Plots of  $\langle R_{gy}^2 \rangle$  vs.  $Pe$  as a function of  $\epsilon_{gp}$ , and (C) Plots of  $\langle R_{gz}^2 \rangle$  vs.  $Pe$  as a function of  $\epsilon_{gp}$  for self-attractive probe-polymer in the crowded nanochannel. Here,  $\langle R_{gx}^2 \rangle$ ,  $\langle R_{gy}^2 \rangle$ , and  $\langle R_{gz}^2 \rangle$  are the values along x-direction, y-direction, and z-direction respectively.

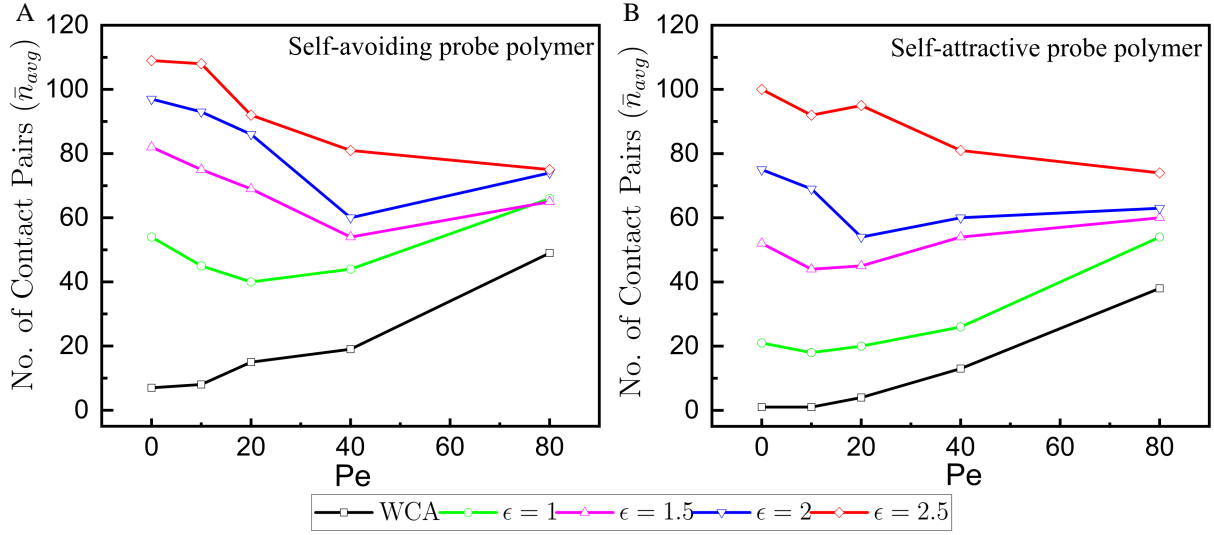

Fig. S4. (A) Contact pair between the self-avoiding probe-polymer and grafted polymers vs. Pe as a function of  $\epsilon_{gp}$  in the crowded nanochannel. (B) Contact pair between the self-attractive probe-polymer and grafted polymers vs. Pe as a function of  $\epsilon_{gp}$  in the crowded nanochannel. Here, the contact pair is calculated by taking a cutoff distance  $1.12\sigma$  which is the  $r_{max}$  value of WCA potential.

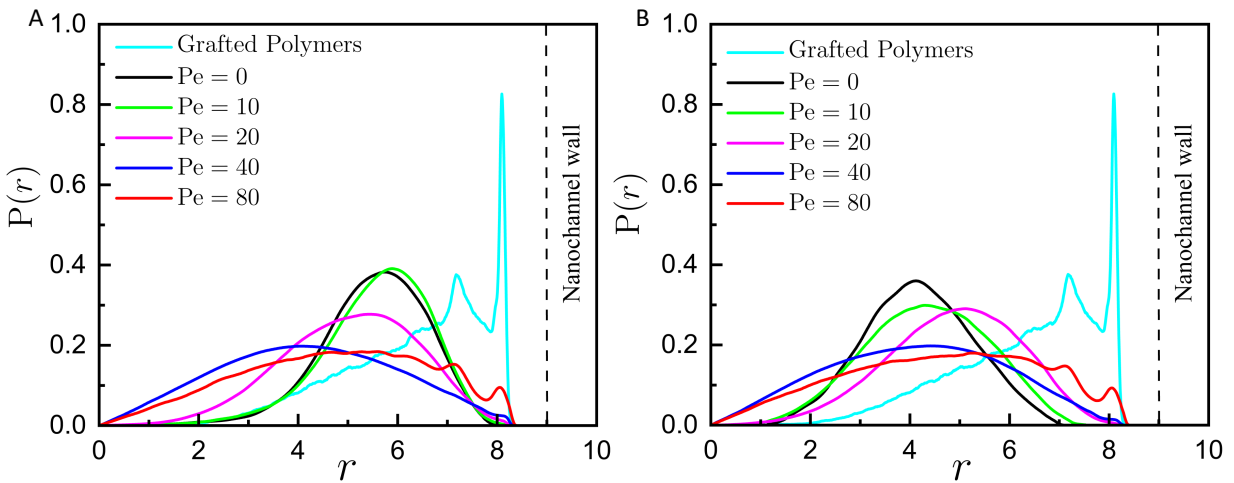

Fig. S5. Probability of finding the (A) self-avoiding probe-polymer and (B) self-attractive probe-polymer along radial direction at different Pe when the interaction is attractive ( $\epsilon_{gp} = 2$ ) with the grafted polymers.

### III. DYNAMICAL PROPERTIES OF A POLYMER INSIDE A NANOCHANNEL WITHOUT GRAFTED POLYMERS

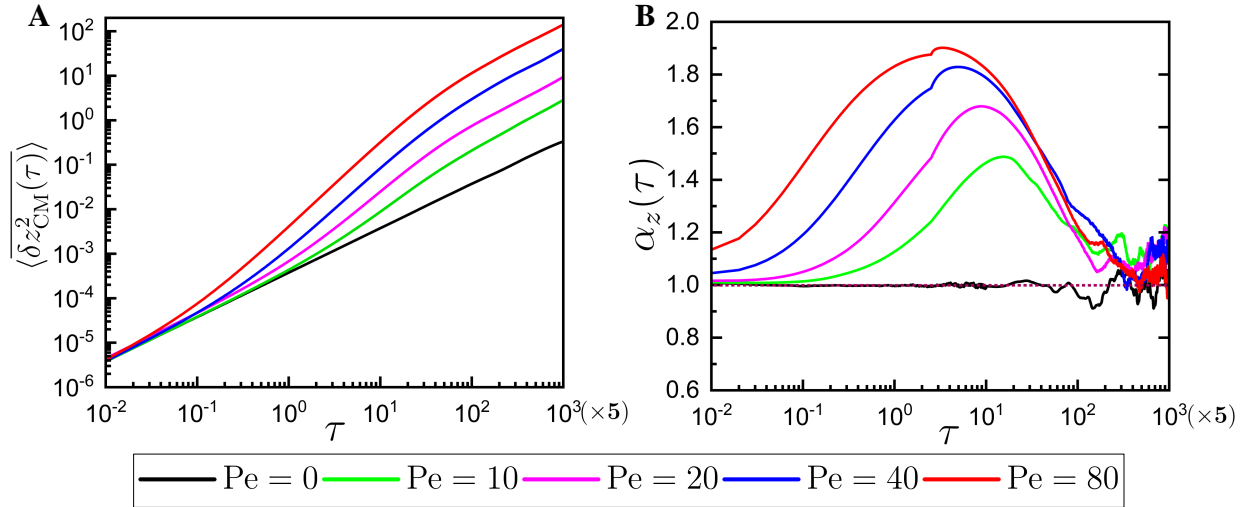

Fig. S6. (A) Log-log plot of  $\langle \delta z_{\text{CM}}^2(\tau) \rangle$  vs  $\tau$  and (B) log-linear plot of time-exponent of self-avoiding probe-polymer at different Pe inside a nanochannel.

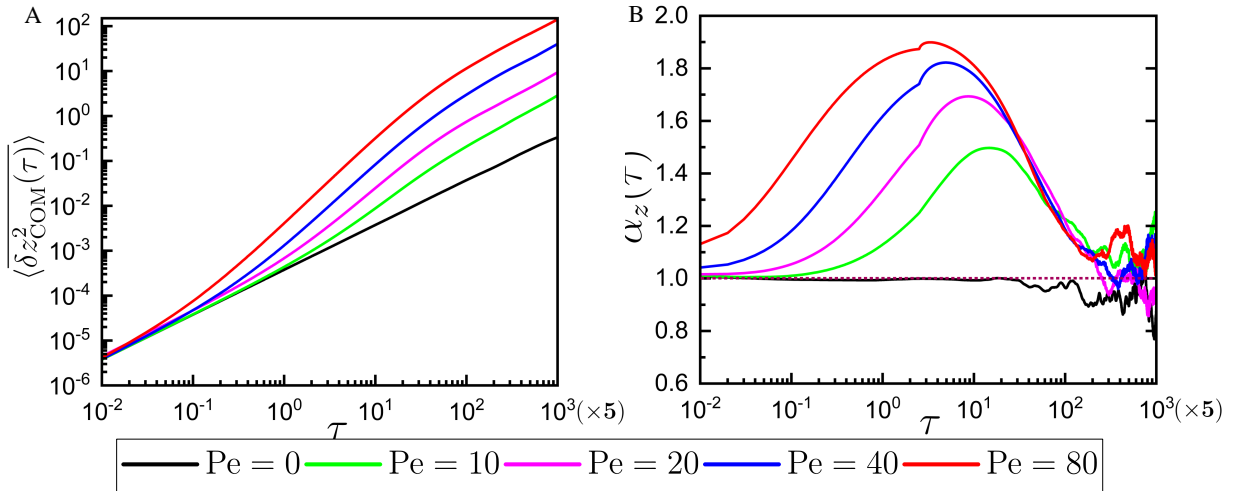

Fig. S7. (A) Log-log plot of  $\langle \delta z_{\text{COM}}^2(\tau) \rangle$  vs  $\tau$  and (B) log-linear plot of time-exponent of self-attractive probe-polymer at different Pe inside a nanochannel.

**IV. DYNAMICAL PROPERTIES OF PROBE-POLYMER INSIDE A  
NANOCHANNEL GRAFTED WITH POLYMERS**

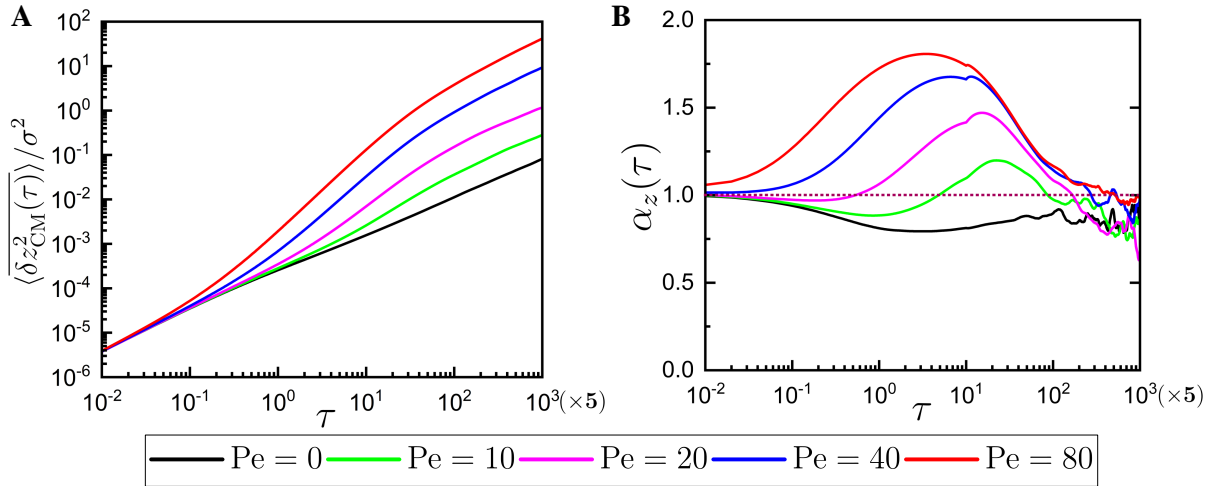

Fig. S8. (A) Log-log plot of  $\langle \delta z_{CM}^2(\tau) \rangle$  vs  $\tau$  and (B) log-linear plot of time-exponent when the interaction is attractive ( $\epsilon_{gp} = 2$ ) with the crowdors for a self-avoiding probe-polymer at different Pe in the crowded nanochannel.

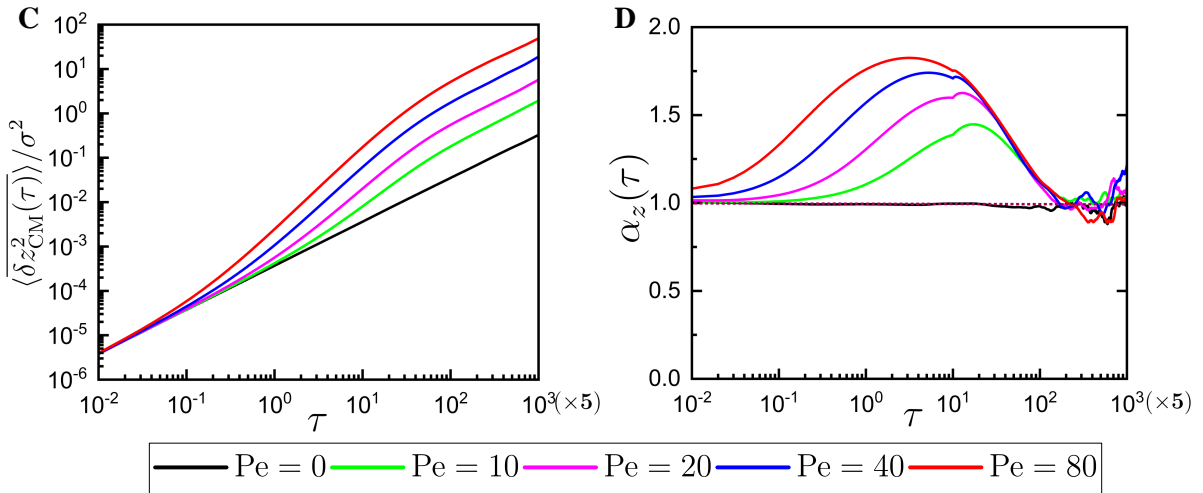

Fig. S9. (A) log-log plot of  $\langle \delta z_{CM}^2(\tau) \rangle$  vs  $\tau$  and (B) log-linear plot of time-exponent when the interaction is repulsive (WCA) with the crowdors for a self-avoiding probe-polymer at different Pe in the crowded nanochannel.

## Movies

The movies illustrate the qualitative difference in the dynamics of the passive and active probe-polymer inside the polymer-grafted nanochannel.

1. Movie1: Molecular dynamics simulation of the passive self-avoiding probe-polymer inside the polymer-grafted cylindrical channel with attractive interaction strength  $\epsilon_{gp} = 2$ . The self-avoiding probe-polymer gets trapped inside the grafted polymers (top view).
2. Movie2: Side view of Movie1. Here we can see that the passive self-avoiding probe-polymer strongly interacts with the grafted polymers and tends to remain inside the grafted polymeric region.
3. Movie3: Molecular dynamics simulation of the active self-avoiding probe-polymer inside the polymer-grafted cylindrical channel with attractive interaction strength ( $\epsilon_{gp} = 2$ ) with the grafted polymers. The self-avoiding probe-polymer escape from the local trap and moves inside the polymer-grafted nanochannel (side view).
4. Movie4: Molecular dynamics simulation of the passive self-attractive probe-polymer inside the polymer-grafted cylindrical channel with attractive interaction strength  $\epsilon_{gp} = 2$ . The self-attractive probe-polymer gets trapped inside the grafted polymers and diffusion slows down (side view).
5. Movie5: Molecular dynamics simulation of the active self-attractive probe-polymer inside the polymer-grafted cylindrical channel with attractive interaction strength ( $\epsilon_{gp} = 2$ ). Here we can see that the activity facilitates the self-attractive probe-polymer to escape from the local trap inside the grafted polymers and moves all over the area inside the channel (side view).
6. Movie6: Molecular dynamics simulation of the passive self-avoiding probe-polymer inside the polymer-grafted cylindrical channel with repulsive interaction (WCA). The self-avoiding probe-polymer diffuses through the hollow space along the cylinder axis created by the grafted polymer (top view).
7. Movie7: Side view of Movie6. It is clearly seen that the grafted polymers push the passive self-avoiding probe-polymer toward the pore-like space along the cylindrical

channel where it diffuses by adopting a compact structure.

8. Movie8: Molecular dynamics simulation of the active self-avoiding probe-polymer inside the polymer-grafted cylindrical channel with repulsive interaction strength (WCA). The self-avoiding probe-polymer escape from the grafted polymers and moves all over the area inside the polymer-grafted nanochannel (side view).
9. Movie9: Molecular dynamics simulation of the passive self-attractive probe-polymer inside the polymer-grafted cylindrical channel with repulsive interaction strength (WCA). The self-attractive probe-polymer diffuses through the hollow space along the cylinder axis created by the grafted polymer (side view).
10. Movie10: Molecular dynamics simulation of the active self-attractive probe-polymer inside the polymer-grafted cylindrical channel with repulsive interaction strength (WCA). Here we can see that the activity facilitates the self-attractive probe-polymer to escape from the local trap and moves all over the area inside the channel (side view).
